# Supplementary material
Source: PubMed Central journal article supplement (PMC4793476)
Supplement: schg012218.ww1_default.pdf [file schg012218.ww1_default.pdf]

**Search strategies for meta-analysis (online supplement)**

**Search strategy for PubMed:** last performed on 13/06/2013

Limits activated: Publication date from 1980/01/01 to 2013/06/13, Humans, Randomized Controlled Trial, Clinical Trial, Controlled Clinical Trial, Child: birth-18 years, Newborn: birth-1 month, Infant: birth-23 months, and Infant: 1-23 months

#1 MeSH descriptor Infant explode all trees (Result: 41,443)

#2 MeSH descriptor Newborn explode all trees (Result: 19,368)

#3 MeSH descriptor Resuscitation explode all trees (Result: 1,809)

#4 MeSH descriptor Continuous Positive Airway Pressure explode all trees (Result: 300)

#5 MeSH descriptor Sustained Inflation explode all trees (Result: 6)

#6 ((#1) AND #2) AND #3 (Result: 945)

#7 (#6) AND #4 (Results: 56)

#8 (#6) AND #5 (Results: 3)

**Search Strategy for EMBASE:** last performed on 13/06/2013

Limits activated: Human, 1980 -Current, and infant <to one year>, Clinical Trial, Randomized Controlled Trial, Controlled Clinical Trial, and Multicentre Study

#1 Infant (Result: 4,625)

#2 Newborn (Result: 4,625)

#3 exp resuscitation/ or exp fluid resuscitation/ or resuscitation.mp. (Result: 49)

#4 Continuous Positive Airway Pressure.mp. or exp positive end expiratory pressure/ (Result: 57)

#5 exp lung injury/ or exp adult respiratory distress syndrome/ or exp high frequency ventilation/ or exp tidal volume/ or exp lung inflation/ or exp lung volume/ or exp positive end expiratory pressure/ or exp artificial ventilation/ or Sustained Inflation.mp. or exp "Australia and New Zealand"/ (Result: 313)

#6 ((#1) AND #2) AND #3 (Result: 33)

#7 (#6) AND #4 (Results: 2)

#8 (#6) AND #5 (Results: 7)
